# Supplementary material for: Coronary Microvascular Dysfunction Is Associated With Augmented Lysosomal Signaling in Hypercholesterolemic Mice
Source: PubMed Central journal article supplement — J Am Heart Assoc. 2024 Nov 27;13(23):e037460. doi: 10.1161/JAHA.124.037460 (PMC11681558; doi:10.1161/jaha.124.037460), 2024-11-27
Supplement: JAH3-13-e037460-s001.pdf [file JAH3-13-e037460-s001.pdf]

# **SUPPLEMENTAL MATERIAL**

**Table S1. The primers used in the present study.**

| Primer (m)     | Forward (5'-3')                   | Reverse (5'-3')           |
|----------------|-----------------------------------|---------------------------|
| GPAT-4         | GTTTGAGCGTTCTGAGGTGA              | GGTTCCTTCTGGGAAGATGA      |
| AGPAT-2        | AAGAAACTGGAGGTGGATGG              | CACACAGCGCTTAGGGAGTA      |
| Lipin-2        | GCTTGTTGCAGTGTACCTT               | TGAACTGACGCAACAACCTGA     |
| DGAT-1         | GTGGTTTCAGCAATTATCGTGG            | GGGTCCTTCSGAAACAGAGAC     |
| DGAT-2         | ATGGGAGTGGCAATGCTATC              | ATAAGTGGGAACCAGATCAGC     |
| ACAT-1         | AGGAGAGTTCGGTCTGGCTA              | CGGTACATGGAACCTGTCTC      |
| ACAT-2         | CTGGAGGCATGGAGAATATGAG            | CATGTGGTAGTTGTGAAAGGC     |
| PLIN-1         | AGGCTGTCTCCTCTACCAAA              | CCACAGTGTCTACCACGTTATC    |
| PLIN-2         | CGTCTGTCTGGACCGAATAAAG            | CACACGCCTTGAGAGAAACA      |
| PLIN-3         | CTGTCTGGAACCTCACTTTGT             | TGCTAGCCGGCCTTTAATC       |
| PLIN-4         | GGCCTGGACACTACCAAAATC             | CCATCTGTGCTGTGCCTTTA      |
| PLIN-5         | CCTCAGCAGGTCACCTTTCAA             | CTGCCTCAGCCTCATGTATC      |
| TF             | AGGATGTGACCTGGGCCTAT              | GGCTGTCCAAGGTTTGTGTC      |
| TFPI           | GGATGAGTGCAAGAAGATCTGTGA<br>GAATC | ATACAGTACCAAGGCAGCCCGAC   |
| THBD           | CCTGGCTCCTATGAGTGTATCT            | CTTCCTTGGTGTCTTCCCTAAC    |
| PAI-1          | AGGATCGAGGTAAACGAGAGC             | GCGGGCTGAGATGACAAA        |
| PAR-1          | CTTCACTTGCGTGGTCATTTGG            | TGGCAGGTGGTGTATGTTGAGTC   |
| TFEB           | CAGCAGGTGGTGAAGCAAGAGT            | TCCAGGTGATGGAACGGAGACT    |
| LC3            | CGTCCTGGACAAGACCAAGT              | ATTGCTGTCCCGAATGTCTC      |
| p62/SQSTM1     | AGGGAACACAGCAAGCT                 | GCCAAAGTGTCCATGTTTCA      |
| LAMP-2A        | CCAAATTGGGATCCTAACCTAA            | TGGTCAAGCAGTGTTTATTAATTCC |
| LAMP-1         | ACATCAGCCCAAATGACACA              | GGCTAGAGCTGGCATTTCATC     |
| Caspase-11     | ACAATGCTGAACGCAGTGAC              | CTGGTTCCTCCATTTCCAGA      |
| TRPML-1        | ATGTGGACCCAGCCAATGATACCTT         | TGTCTTCAGCTGGAAGTGGATGGT  |
| Beclin-1       | AATCTAAGGAGTTGCCGTTATAC           | CCAGTGTCTTCAATCTTGCC      |
| SMPD-1         | GTCTTATTCACTGCTCTCAACC            | GTCTTATTCACTGCTCTCAACC    |
| $\beta$ -actin | TCGCTGCGCTGGTCGTC                 | GGCCTCGTCACCCACATAGGA     |
| GAPDH          | CCAGAACATCATCCCTGCAT              | CAGTGAGCTTCCCCTTCA        |
